# Supplementary material for: Chemically grown bismuth-oxy-iodide (BiOI/Bi9I2) nanostructure for high performance battery-type supercapacitor electrodes
Source: Royal Society of Chemistry journal article supplement (doi:10.1039/c9dt04365a), 2019-12-18
Supplement: c9dt04365a1.pdf [file c9dt04365a1.pdf]

**Chemically grown Bismuth-oxy-iodide ( $\text{BiOI}/\text{Bi}_9\text{I}_2$ ) nanostructure for high performance Battery-type supercapacitor electrodes**

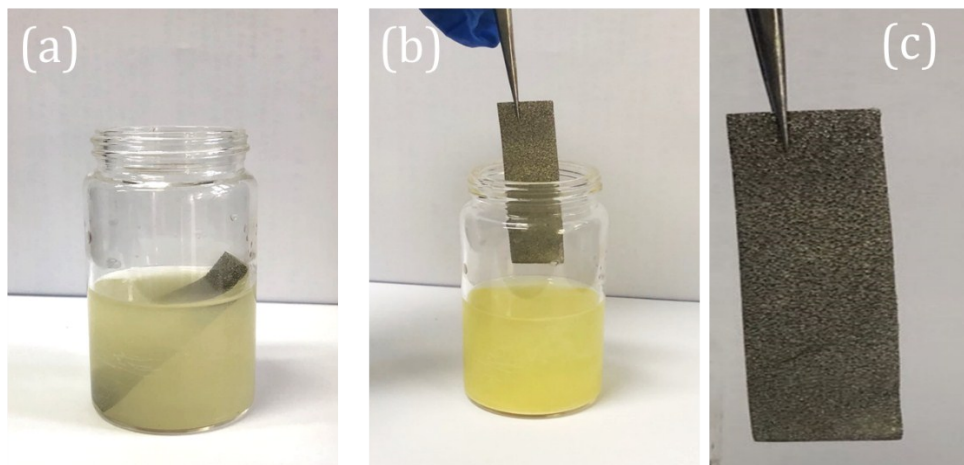

Fig S1 Actual experimental set-up including (a and b ) before and after dipping Ni-foam in bismuth oxy-iodide ( $\text{BiOI}/\text{Bi}_9\text{I}_2$ ) precursor solution with (c) uniform growth of  $\text{BiOI}/\text{Bi}_9\text{I}_2$  film over Ni-foam.

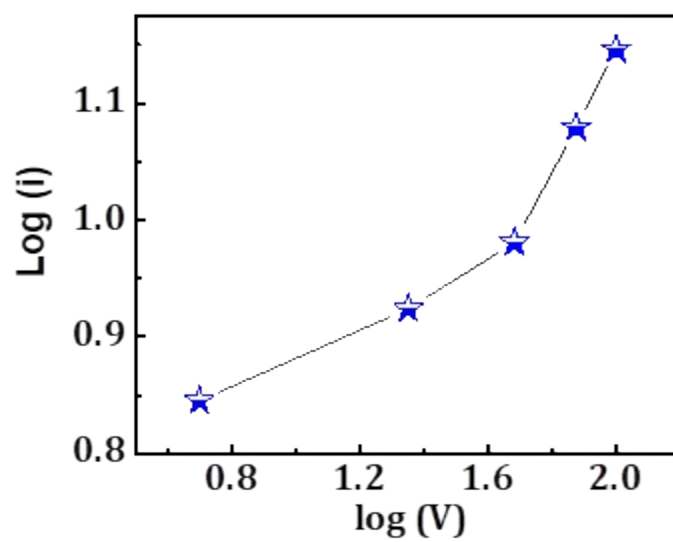

Fig S2. Log (i) Vs Log (V) for calculation b value for BiOI/Bi<sub>9</sub>I<sub>2</sub> electrode.
